# Supplementary material
Source: publisher figshare collection journal article supplement (https://diabetesjournals.figshare.com/ndownloader/files/27457616)
Supplement: Supplementary file 1 [file 27457616]

**Manuscript Title: Diabetic kidney disease alters the transcriptome and function of human adipose-derived mesenchymal stromal cells but maintains immunomodulatory and paracrine activities important for renal repair**

## **Supplemental Materials**

### **MSC Harvesting and Phenotyping Methods**

MSC were isolated from abdominal subcutaneous fat (0.5-2 g), cultured, and characterized as previously described.<sup>1-5</sup> In brief, adipose tissues were minced and digested in 2% collagenase type I at 37°C for 45 minutes (Gibco, NY). Afterward, the suspension was filtered through a 100 µm cell strainer (BD Biosciences, San Jose, CA) to remove remaining tissue pieces and then centrifuged at 1000 RPM for 5 minutes (233 relative centrifugal force) to pellet cells. Cells were cultured in Advanced minimum-essential-medium (MEM; Thermo Fisher Scientific, Waltham, MA) supplemented with 5% platelet lysate (PLTMax, Mill Creek Life Sciences, Rochester, MN) and 2 mM L-glutamine (Invitrogen, Carlsbad, CA) in a 37°C incubator with 5% CO<sub>2</sub> incubator for 3–4 days. When 60-80% confluent, cells were passaged using TrypLE (Trypsin-like Enzyme, Invitrogen). The 3<sup>rd</sup> passage was collected and kept in Gibco Cell Culture Freezing Medium (Life Technologies, Carlsbad, CA) at -80°C. Cells were then characterized<sup>6</sup> by surface marker positivity to CD73, CD90, CD105, and negativity to CD34 and CD45 (according to the manufacturer's recommended dilution; Abcam, Cambridge, MA; BD Pharmigen, San Jose, CA; BioLegend, San Diego, CA) and analyzed by flow cytometry (FlowSight, Amnis, Seattle, WA) using Amnis<sup>®</sup> Image Data Exploration and Analysis Software (IDEAS v.6.2). MSC phenotype was further confirmed by trilineage differentiation into osteocyte (mouse anti-human osteocalcin), adipocyte (goat anti-mouse FABP-4 antibody), and chondrocyte (goat anti-human

aggrecan antibody) lineages using a Human MSC Functional identification kit (R&D Systems, Minneapolis, MN) following manufacturer's instructions.

**Supplemental Table 1. Demographic characteristics of participants with diabetic kidney disease and controls at time of adipose tissue sampling for mesenchymal stem/ stromal cell harvest -Migration and Proliferation subset**

| MSC Migration and Proliferation       |                         |                    |                |
|---------------------------------------|-------------------------|--------------------|----------------|
|                                       | <b>Controls</b><br>n=16 | <b>DKD</b><br>n=38 | <b>p-value</b> |
| <b>Age, years</b>                     | 63.3 (3.4)              | 64.8 (6.8)         | 0.12           |
| <b>Female Sex</b>                     | 9 (56.3%)               | 17 (44.7%)         | 0.44           |
| <b>White Race</b>                     | 16 (100%)               | 33 (86.8%)         | 0.51           |
| <b>Diabetes Type 1</b>                | --                      | 8 (21.1%)          | --             |
| <b>Diabetes Type 2</b>                | --                      | 30 (78.9%)         | --             |
| <b>Diabetes Duration, years</b>       | --                      | 23.9 (16.0)        | --             |
| <b>BMI, kg/ m<sup>2</sup></b>         | 29.8 (3.1)              | 34.1 (6.0)         | 0.009          |
| <b>eGFR, ml/min/1.73m<sup>2</sup></b> | 77.6 (12.5)             | 44.7 (19.7)        | --             |
| <b>Glucose, mg/dL</b>                 | 108.6 (20.0)            | 167.0 (64.8)       | --             |
| <b>HbA1c, %</b>                       | --                      | 7.8 (1.2)          | --             |
| <b>UACR, mg/g</b>                     | --                      | 507.5 (1202.0)     | --             |
| <b><u>Anti-Diabetes therapy*</u></b>  |                         |                    |                |
| <b>Insulin only</b>                   | --                      | 25 (65.8%)         | --             |
| <b>Oral/other</b>                     | --                      | 22 (57.9%)         | --             |
| <b>Insulin+Oral/Other</b>             | --                      | 11 (28.9%)         | --             |

Data are mean (SD) or n (%)

BMI: body mass index; DKD: diabetic kidney disease; eGFR: estimated glomerular filtration rate; HbA1c: hemoglobin A1c; UACR: urine albumin:creatinine ratio: random sample; Rx: therapy; ACEI: angiotensin converting enzyme inhibitor; ARB: angiotensin receptor blocker; NGSP HbA1c converter <http://www.ngsp.org/convert1.asp> can be used to calculate HbA1c values from % to mmol/mol.\*Values do not add up to 100% of sample total.

HbA1c 7.8 % NGSP = 62 mmol/mol IFCC = 177 mg/dL eAG = 9.8 mmol/l eAG  
Change or SD of 1.20 % NGSP = 13.1 mmol/mol IFCC = 34.4 mg/dL eAG = 1.91 mmol/l eAG

**Supplemental Table 2. Demographic characteristics of participants with diabetic kidney disease and controls at time of adipose tissue sampling for mesenchymal stem/ stromal cell harvest – MSC RNA Sequencing subset**

|                                       | MSC RNA Sequencing |                | p-value |
|---------------------------------------|--------------------|----------------|---------|
|                                       | Controls<br>n=9    | DKD<br>n=29    |         |
| <b>Age, years</b>                     | 63.9 (3.9)         | 65.4 (8.0)     | 0.2     |
| <b>Female Sex</b>                     | 4 (44.4%)          | 9 (31.0%)      | 0.46    |
| <b>White Race</b>                     | 9 (100%)           | 24 (82.8%)     | 0.41    |
| <b>Diabetes Type 1</b>                | --                 | 3 (10.3%)      | --      |
| <b>Diabetes Type 2</b>                | --                 | 26 (89.7%)     | --      |
| <b>Diabetes Duration, years</b>       | --                 | 20.7 (13.8)    | --      |
| <b>BMI, kg/ m<sup>2</sup></b>         | 28.8 (3.63)        | 35.4 (5.8)     | 0.004   |
| <b>eGFR, ml/min/1.73m<sup>2</sup></b> | 80.5 (8.5)         | 39.0 (15.5)    | --      |
| <b>Glucose, mg/dL</b>                 | 112.2 (18.5)       | 179.3 (87.2)   | --      |
| <b>HbA1c, %</b>                       | --                 | 7.9 (1.3)      | --      |
| <b>UACR, mg/g</b>                     | --                 | 585.3 (1307.8) | --      |
| Data are mean (SD) or n (%)           |                    |                |         |

BMI: body mass index; DKD: diabetic kidney disease; eGFR: estimated glomerular filtration rate; HbA1c: hemoglobin A1c; UACR: urine albumin:creatinine ratio: random sample; Rx: therapy; ACEI: angiotensin converting enzyme inhibitor; ARB: angiotensin receptor blocker; NGSP HbA1c converter <http://www.ngsp.org/convert1.asp> can be used to calculate HbA1c values from % to mmol/mol.

HbA1c 7.9 % NGSP = 63 mmol/mol IFCC = 180 mg/dL eAG = 10.0 mmol/l eAG  
 Change or SD of 1.30 % NGSP = 14.2 mmol/mol IFCC = 37.3 mg/dL eAG = 2.07 mmol/l eAG

**Supplemental Table 3. Demographic characteristics of participants with diabetic kidney disease and controls at time of adipose tissue sampling for mesenchymal stem/ stromal cell harvest – MSC Conditioned Medium subset**

|                                       | MSC Conditioned Medium  |                    |                |
|---------------------------------------|-------------------------|--------------------|----------------|
|                                       | <b>Controls</b><br>n=10 | <b>DKD</b><br>n=38 | <b>p-value</b> |
| <b>Age, years</b>                     | 63.6 (3.1)              | 65.1 (6.9)         | 0.2            |
| <b>Female Sex</b>                     | 6 (60.0%)               | 17 (44.7%)         | 0.39           |
| <b>White Race</b>                     | 10 (100%)               | 33 (86.8%)         | 0.69           |
| <b>Diabetes Type 1</b>                | --                      | 8 (21.1%)          | --             |
| <b>Diabetes Type 2</b>                | --                      | 30 (78.9%)         | --             |
| <b>Diabetes Duration, years</b>       | --                      | 23.9 (16.0)        | --             |
| <b>BMI, kg/ m<sup>2</sup></b>         | 30.7 (2.9)              | 34.1 (6.0)         | 0.08           |
| <b>eGFR, ml/min/1.73m<sup>2</sup></b> | 75.3 (13.6)             | 44.7 (19.7)        | --             |
| <b>Glucose, mg/dL</b>                 | 111.6 (20.4)            | 167.0 (64.8)       | --             |
| <b>HbA1c, %</b>                       | --                      | 7.8 (1.2)          | --             |
| <b>UACR, mg/g</b>                     | --                      | 507.5 (1202.0)     | --             |
| Data are mean (SD) or n (%)           |                         |                    |                |

BMI: body mass index; DKD: diabetic kidney disease; eGFR: estimated glomerular filtration rate; HbA1c: hemoglobin A1c; UACR: urine albumin:creatinine ratio: random sample; Rx: therapy; ACEI: angiotensin converting enzyme inhibitor; ARB: angiotensin receptor blocker; NGSP HbA1c converter <http://www.ngsp.org/convert1.asp> can be used to calculate HbA1c values from % to mmol/mol.

HbA1c 7.8 % NGSP = 62 mmol/mol IFCC = 177 mg/dL eAG = 9.8 mmol/l eAG  
 Change or SD of 1.20 % NGSP = 13.1 mmol/mol IFCC = 34.4 mg/dL eAG = 1.91 mmol/l eAG

**Supplemental Table 4. Demographic characteristics of participants with diabetic kidney disease and controls at time of adipose tissue sampling for mesenchymal stem/ stromal cell harvest – MSC Senescence Associated (SA)- $\beta$ -galactosidase Activity subset**

|                                       | MSC SA- $\beta$ -galactosidase (SA $\beta$ -gal) activity |                | p-value |
|---------------------------------------|-----------------------------------------------------------|----------------|---------|
|                                       | Controls<br>n=14                                          | DKD<br>n=27    |         |
| <b>Age, years</b>                     | 63.6 (3.4)                                                | 64.3 (7.8)     | 0.46    |
| <b>Female Sex</b>                     | 7 (50.0%)                                                 | 10 (37.0%)     | 0.42    |
| <b>White Race</b>                     | 14 (100%)                                                 | 22 (81.5%)     | 0.23    |
| <b>Diabetes Type 1</b>                | --                                                        | 14 (14.8%)     | --      |
| <b>Diabetes Type 2</b>                | --                                                        | 23 (85.2%)     | --      |
| <b>Diabetes Duration, years</b>       | --                                                        | 20.7 (13.9)    | --      |
| <b>BMI, kg/ m<sup>2</sup></b>         | 29.7 (3.3)                                                | 35.8 (5.8)     | 0.0006  |
| <b>eGFR, ml/min/1.73m<sup>2</sup></b> | 77.7(11.8)                                                | 38.7 (16.1)    | --      |
| <b>Glucose, mg/dL</b>                 | 108.6 (21.2)                                              | 172.4 (72.5)   | --      |
| <b>HbA1c, %</b>                       | --                                                        | 8.0 (1.3)      | --      |
| <b>UACR, mg/g</b>                     | --                                                        | 581.1 (1335.9) | --      |

Data are mean (SD) or n (%)

BMI: body mass index; DKD: diabetic kidney disease; eGFR: estimated glomerular filtration rate; HbA1c: hemoglobin A1c; UACR: urine albumin:creatinine ratio: random sample; Rx: therapy; ACEI: angiotensin converting enzyme inhibitor; ARB: angiotensin receptor blocker; NGSP HbA1c converter <http://www.ngsp.org/convert1.asp> can be used to calculate HbA1c values from % to mmol/mol.

HbA1c 8.0 % NGSP = 64 mmol/mol IFCC = 183 mg/dL eAG = 10.2 mmol/l eAG  
Change or SD of 1.30 % NGSP = 14.2 mmol/mol IFCC = 37.3 mg/dL eAG = 2.07 mmol/l eAG

**Supplemental Table 5. Univariate comparison between MSC *in vitro* studies and gender among participants with diabetic kidney disease (DKD)**

| MSC studies in participants with DKD |                                                      |                    |                    |     |
|--------------------------------------|------------------------------------------------------|--------------------|--------------------|-----|
|                                      | <i>In vitro</i> Study                                | Gender             |                    |     |
|                                      |                                                      | Females            | Males              |     |
| MSC Function                         |                                                      | N=19               | N=30               |     |
|                                      | Migration                                            | 0.51 (0.12)        | 0.51 (0.11)        | 0.8 |
|                                      | Proliferation                                        | 0.39 (0.04)        | 0.38 (0.05)        | 0.4 |
| MSC Secretome                        |                                                      | N=19               | N=29               |     |
|                                      | <b>Proangiogenesis, Anti-apoptosis, Antifibrosis</b> |                    |                    |     |
|                                      | VEGF-A                                               | 2069.19 (1092.50)  | 2345.90 (1931.04)  | 0.8 |
|                                      | HGF                                                  | 4560.90 (3013.77)  | 4676.14 (3274.47)  | 0.9 |
|                                      | SDF                                                  | 97.02 (101.02)     | 144.58 (119.25)    | 0.3 |
|                                      | <b>Immunomodulatory</b>                              |                    |                    |     |
|                                      | IDO                                                  | 0.27 (0.16)        | 0.29 (0.18)        | 0.9 |
|                                      | PGE2                                                 | 1.68 (1.11)        | 1.58 (1.11)        | 0.8 |
|                                      | IL-6                                                 | 1261.73 (350.56)   | 1214.60 (369.62)   | 0.6 |
| MSC Senescence                       |                                                      | N=10               | N=17               |     |
|                                      | SA- $\beta$ -gal                                     | 25186.55 (2765.60) | 25101.79 (2502.17) | 0.9 |
|                                      | Data are mean (SD)                                   |                    |                    |     |

\*PGE2 (n=10 Female; n=14 Male). VEGF: vascular endothelial growth factor; HGF: hepatocyte growth factor; SDF: stromal cell derived factor-1 (or CXCL12); IDO: indoleamine 2,3 deoxygenase-1; PGE2: prostaglandin E2; IL: interleukin; SA- $\beta$ -gal: senescence-associated beta-galactosidase; UACR: Urine albumin:creatinine ratio (per mg/g creatinine). Units of measurement: ng/mL for all IDO, PGE2, and activin A; pg/mL for VEGF-A, VEGF-C, HGF, and IL-6. Other studies are expressed as OD: optical density (Migration), ABS 490: Absorbance 490 nm wavelength (Proliferation); and RFU: relative fluorescence unit (SA- $\beta$ -gal). Additional studies: epithelial growth factor (angiogenic), bone morphometric protein-7 (anti-fibrosis), and TNF $\alpha$  (proinflammatory) were undetectable in culture medium by ELISA/Luminex.

**Supplemental Table 6. Univariate comparison between MSC *in vitro* studies and diabetes type or metformin use among participants with diabetic kidney disease (DKD)**

| MSC studies in participants with DKD                 |                       |                       |         |                                     |                                     |             |
|------------------------------------------------------|-----------------------|-----------------------|---------|-------------------------------------|-------------------------------------|-------------|
| <i>In vitro</i> Study                                | Diabetes Type         |                       |         | Metformin Therapy                   |                                     |             |
|                                                      | Type 1                | Type 2                | p value | Non-Use                             | Use                                 | p value     |
| <b>MSC Function</b>                                  | N=10                  | N=39                  |         | N=33                                | N=16                                |             |
| Migration                                            | 0.54 (0.13)           | 0.50 (0.11)           | 0.3     | 0.51 (0.12)                         | 0.51 (0.09)                         | 0.7         |
| Proliferation                                        | 0.39 (0.04)           | 0.38 (0.05)           | 0.5     | 0.38 (0.05)                         | 0.40 (0.04)                         | 0.1         |
| <b>MSC Secretome</b>                                 | N=10                  | N=38                  |         | N=32                                | N=16                                |             |
| <b>Proangiogenesis, Anti-apoptosis, Antifibrosis</b> |                       |                       |         |                                     |                                     |             |
| VEGF-A                                               | 1970.44<br>(1168.02)  | 2306.35<br>(1752.22)  | 0.6     | 2150.12<br>(1352.11)                | 2408.85<br>(2150.72)                | 0.8         |
| HGF                                                  | 4306.34<br>(3452.41)  | 4715.83<br>(3097.06)  | 0.7     | 4849.51<br>(3036.42)                | 4192.55<br>(3396.83)                | 0.4         |
| SDF                                                  | 111.75<br>(87.37)     | 133.37<br>(124.17)    | 0.7     | 143.75<br>(106.10)                  | 87.09<br>(127.00)                   | 0.1         |
| <b>Immunomodulatory</b>                              |                       |                       |         |                                     |                                     |             |
| IDO                                                  | 0.25 (0.26)           | 0.30 (0.14)           | 0.07    | 0.28 (0.19)                         | 0.30 (0.12)                         | 0.4         |
| PGE2*                                                | 0.56 (0.28)           | 1.77 (1.08)           | 0.2     | 1.53 (1.17)                         | 1.75 (1.00)                         | 0.7         |
| IL-6                                                 | 1027.82<br>(308.74)   | 1287.31<br>(355.34)   | 0.06    | 1176.37<br>(347.11)                 | 1347.02<br>(366.71)                 | 0.2         |
| <b>MSC Senescence</b>                                | N=4                   | N=23                  |         | N=10                                | N=17                                |             |
| SA-β-gal                                             | 26904.38<br>(2270.54) | 24825.15<br>(2512.32) | 0.1     | <b>25868.18</b><br><b>(2555.24)</b> | <b>23883.70</b><br><b>(2102.69)</b> | <b>0.03</b> |
| <b>Data are mean (SD)</b>                            |                       |                       |         |                                     |                                     |             |

\*PGE2 (n=3 Type 2; n=21 Type2; n=14 Metformin Non-Use; n=10 Use). VEGF: vascular endothelial growth factor; HGF: hepatocyte growth factor; SDF: stromal cell derived factor-1 (or CXCL12); IDO: indoleamine 2,3 deoxygenase-1; PGE2: prostaglandin E2; IL: interleukin; SA-β-gal: senescence-associated beta-galactosidase; UACR: Urine albumin:creatinine ratio (per mg/g creatinine). Units of measurement: ng/mL for all IDO, PGE2, and activin A; pg/mL for VEGF-A, VEGF-C, HGF, and IL-6. Other studies are expressed as OD: optical density (Migration), ABS 490: Absorbance 490 nm wavelength (Proliferation); and RFU: relative fluorescence unit (SA-β-gal). Additional studies: epithelial growth factor (angiogenic), bone morphometric protein-7 (anti-fibrosis), and TNFα (proinflammatory) were undetectable in culture medium by ELISA/Luminex.



**Supplemental Table 7. Univariate correlation coefficients between MSC *in vitro* studies and patient characteristics among Control participants**

| MSC studies in Controls                              |               |             |               |             |         |         |              |             |
|------------------------------------------------------|---------------|-------------|---------------|-------------|---------|---------|--------------|-------------|
| <i>In vitro</i> Study                                | Age           |             | BMI           |             | Glucose |         | eGFR         |             |
|                                                      | $r_s$         | p-value     | $r_s$         | p-value     | $r_s$   | p-value | $r_s$        | p-value     |
| <b>MSC Function</b>                                  |               |             |               |             |         |         |              |             |
| Migration                                            | 0.182         | 0.5         | -0.144        | 0.6         | -0.293  | 0.3     | -0.292       | 0.3         |
| Proliferation                                        | 0.379         | 0.1         | -0.049        | 0.9         | -0.055  | 0.08    | -0.028       | 0.9         |
| <b>MSC Secretome</b>                                 |               |             |               |             |         |         |              |             |
| <b>Proangiogenesis, Anti-apoptosis, Antifibrosis</b> |               |             |               |             |         |         |              |             |
| VEGF-A                                               | 0.544         | 0.1         | <b>-0.661</b> | <b>0.04</b> | 0.311   | 0.4     | -0.200       | 0.6         |
| HGF                                                  | 0.030         | 0.9         | <b>-0.709</b> | <b>0.02</b> | 0.433   | 0.2     | -0.212       | 0.6         |
| SDF                                                  | 0.240         | 0.5         | -0.294        | 0.4         | 0.041   | 0.9     | -0.587       | 0.07        |
| <b>Immunomodulatory</b>                              |               |             |               |             |         |         |              |             |
| IDO                                                  | <b>-0.671</b> | <b>0.04</b> | 0.558         | 0.09        | -0.179  | 0.6     | 0.018        | 0.9         |
| PGE2                                                 | -0.006        | 0.9         | 0.467         | 0.2         | -0.409  | 0.2     | <b>0.709</b> | <b>0.02</b> |
| IL-6                                                 | -0.106        | 0.8         | -0.127        | 0.7         | 0.030   | 0.9     | -0.261       | 0.5         |
| <b>MSC Senescence</b>                                |               |             |               |             |         |         |              |             |
| SA- $\beta$ -gal                                     | -0.372        | 0.2         | 0.125         | 0.7         | 0.018   | 0.9     | 0.305        | 0.3         |

Migration and proliferation n=16, SA- $\beta$ -gal activity: n=14; all MSC secretome studies n=10. Age (per year); BMI: body mass index (per kg/m<sup>2</sup>), glucose (per g/dL); eGFR: estimated glomerular filtration rate (per mL/min/1.73m<sup>2</sup>); UACR urine albumin:creatinine (per mg/g); eGFR: estimated glomerular filtration rate (per mL/min/1.73m<sup>2</sup>); UACR (per mg/g);  $r_s$ : Spearman's Rank Correlation coefficient; VEGF: vascular endothelial growth factor; HGF: hepatocyte growth factor; SDF: stromal cell derived factor-1 (or CXCL12); IDO: indoleamine 2,3 deoxygenase-1; PGE2: prostaglandin E2; IL: interleukin; SA- $\beta$ -gal: senescence-associated beta-galactosidase; UACR: Urine albumin:creatinine ratio (per mg/g creatinine). Units of measurement: ng/mL for all IDO, PGE2, and activin A; pg/mL for VEGF-A, VEGF-C, HGF, and IL-6. Other studies are expressed as OD: optical density (Migration), ABS 490: Absorbance 490 nm wavelength (Proliferation); and RFU: relative fluorescence unit (SA- $\beta$ -gal). Additional studies: epithelial growth factor (angiogenic), bone morphometric protein-7 (anti-fibrosis), and TNF $\alpha$  (proinflammatory) were undetectable in culture medium by ELISA/Luminex.

# Supplemental Figure 1. Upregulated and Downregulated Ingenuity Pathways for Differentially Expressed MSC Genes

## A Upregulated Pathways

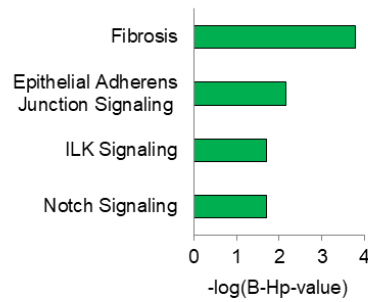

## B Downregulated Pathways

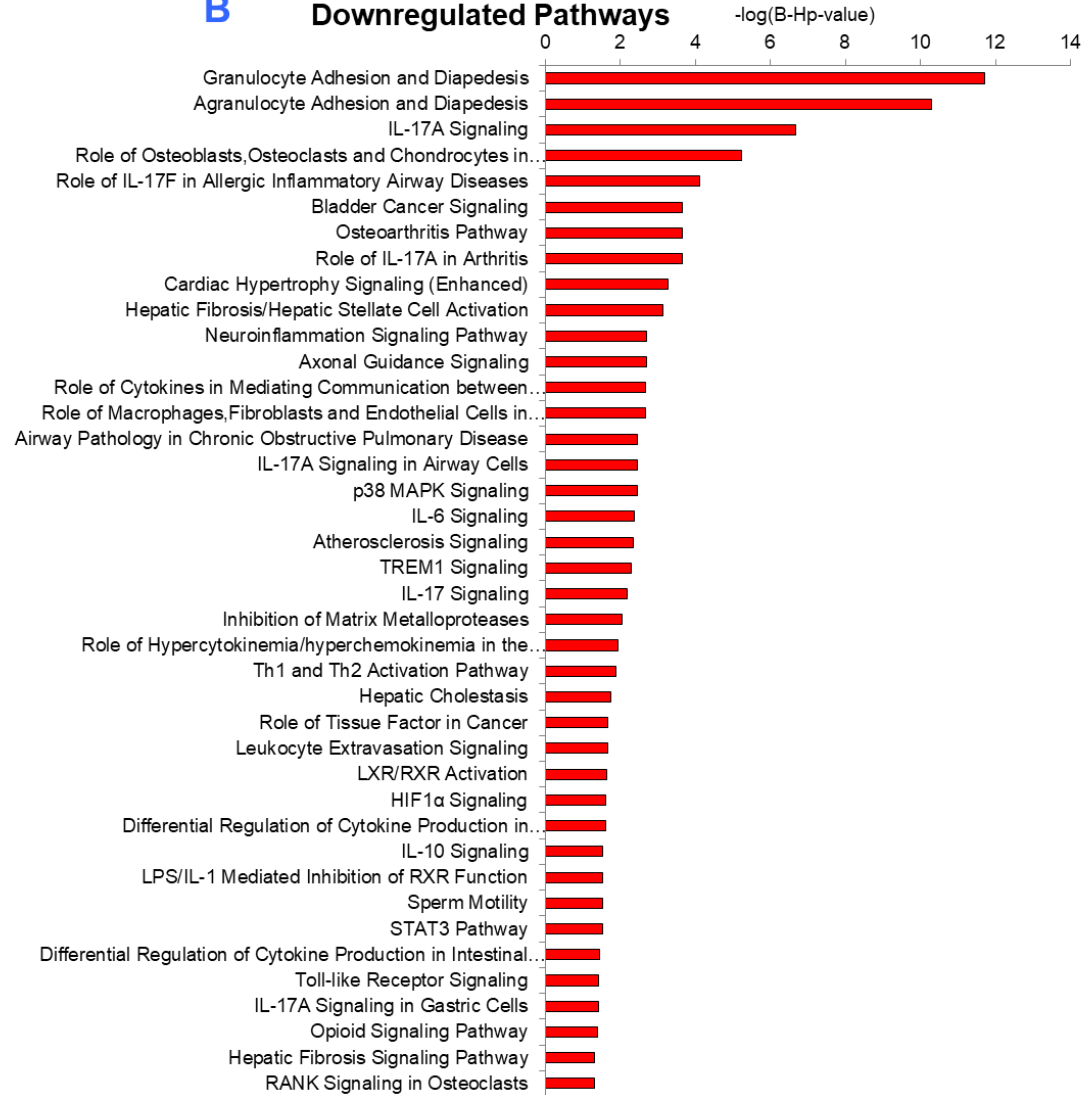

$-\log(B-Hp\text{-Values}) > 1.3 = p < 0.05$

Supplemental Figure 1 Legend. Functional annotation clustering analyses were performed in differentially expressed MSC genes consisting of **A**) upregulated (n=4) and **B**) downregulated (n=40) pathways with statistical significance.  $-\log(\text{B-H pvalues}) > 1.3$  represent pathways with  $p < 0.05$ . ILK (integrin-linked kinase); IL-17A (interleukin-17A); IL-17F (interleukin-17F); MAPK (mitogen-activated protein kinases); IL-6 (interleukin-6); TREM1 (triggering receptor expressed on myeloid cells 1); IL-17 (interleukin-17); Th1 (T helper type 1); Th2 (T helper type 2); LXR/RXR (liver X receptors and retinoid X receptors); HIF1 $\alpha$  (hypoxia inducible factor 1 $\alpha$ ); IL-10 (interleukin-10); LPS/IL-1 (lipopolysaccharide/ interleukin-1); STAT3 (signal transducer and activator of transcription 3); RANK (receptor activator of nuclear factor  $\kappa$  B)

## **REFERENCES:**

1. Eirin A, Zhu XY, Krier JD, et al. Adipose tissue-derived mesenchymal stem cells improve revascularization outcomes to restore renal function in swine atherosclerotic renal artery stenosis. *Stem cells (Dayton, Ohio)*. 2012;30(5):1030-1041.
2. Eirin A, Zhu XY, Puranik AS, et al. Mesenchymal stem cell-derived extracellular vesicles attenuate kidney inflammation. *Kidney international*. 2017;92(1):114-124.
3. Zhu XY, Ma S, Eirin A, et al. Functional Plasticity of Adipose-Derived Stromal Cells During Development of Obesity. *Stem cells translational medicine*. 2016;5(7):893-900.
4. Saad A, Dietz AB, Herrmann SMS, et al. Autologous Mesenchymal Stem Cells Increase Cortical Perfusion in Renovascular Disease. *Journal of the American Society of Nephrology : JASN*. 2017;28(9):2777-2785.
5. Saad A, Zhu XY, Herrmann S, et al. Adipose-derived mesenchymal stem cells from patients with atherosclerotic renovascular disease have increased DNA damage and reduced angiogenesis that can be modified by hypoxia. *Stem cell research & therapy*. 2016;7(1):128.
6. Dominici M, Le Blanc K, Mueller I, et al. Minimal criteria for defining multipotent mesenchymal stromal cells. The International Society for Cellular Therapy position statement. *Cytotherapy*. 2006;8(4):315-317.
